# Supplementary material for: Standardization and performance evaluation of mononuclear cell cytokine secretion assays in a multicenter study
Source: PubMed Central journal article supplement (PMC1762025; doi:10.1186/1471-2172-7-29), 2006-12-12
Supplement: 1471-2172-7-29-S1.pdf [file 1471-2172-7-29-S1.pdf]

Supplemental Table 1. - Cytokine from fresh and cryopreserved PBMC.

| Stimulant | Cytokine | Day | N    | Fresh  | Geometric mean | Fresh   | N                                    | Nalgene                              | Geometric mean | Fresh   | N                                   | Nalgene                             | p-value for the ratio of |             |
|-----------|----------|-----|------|--------|----------------|---------|--------------------------------------|--------------------------------------|----------------|---------|-------------------------------------|-------------------------------------|--------------------------|-------------|
|           |          |     |      |        |                |         |                                      |                                      |                |         |                                     |                                     | Geometric mean           | correlation |
| MEDIUM    | IFN      | 1   | 16   | 7.4    | 10             | 16.3    | 0.304                                | 10                                   | 3.1            | 0.072   |                                     |                                     |                          |             |
|           |          | 2   | 20   | 6.5    | 20             | 12.4    | 0.288                                | 15                                   | 3.3            | 0.243   |                                     |                                     |                          |             |
|           |          | 3   | 16   | 11.3   | 10             | 33.7    | 0.153                                | 11                                   | 3.8            | 0.11    | $\rho=0.08$ (0.18,0.33)             |                                     |                          |             |
|           | TNF      | 1   | 16   | 12.8   | 10             | 18.9    | 0.484                                | 10                                   | 22.0           | 0.317   |                                     |                                     |                          |             |
|           |          | 2   | 20   | 4.6    | 21             | 28.0    | <0.001                               | 15                                   | 22.0           | <0.001  |                                     |                                     |                          |             |
|           |          | 3   | 16   | 4.6    | 10             | 33.1    | <0.001                               | 11                                   | 6.2            | 0.226   | $\rho=0.370$ (0.13,0.57)            |                                     |                          |             |
|           | IL-10    | 1   | 16   | 9.9    | 10             | 6.8     | 0.438                                | 10                                   | 2.6            | 0.001   |                                     |                                     |                          |             |
|           |          | 2   | 20   | 6.1    | 21             | 7.8     | 0.233                                | 15                                   | 3.0            | 0.13    |                                     |                                     |                          |             |
|           |          | 3   | 16   | 4.2    | 9              | 4.4     | 0.904                                | ND                                   | 11             | 2.6     | 0.251                               |                                     |                          |             |
|           | IL-5     | 1   | 16   | 1.9    | 10             | 2.7     | 0.43                                 | 10                                   | 1.8            | 0.815   |                                     |                                     |                          |             |
|           |          | 2   | 20   | 1.7    | 21             | 2.4     | 0.299                                | 15                                   | 2.0            | 0.885   |                                     |                                     |                          |             |
|           |          | 3   | 16   | 2.3    | 10             | 3.8     | 0.021                                | 11                                   | 2.0            | 0.777   |                                     |                                     |                          |             |
|           | IL-4     | 1   | 16   | 2.3    | 10             | 2.5     | 0.757                                | 10                                   | 1.9            | 0.525   |                                     |                                     |                          |             |
|           |          | 2   | 20   | 2.6    | 21             | 1.6     | 0.077                                | 15                                   | 2.3            | 0.734   |                                     |                                     |                          |             |
|           |          | 3   | 16   | 2.7    | 10             | 2.7     | 0.997                                | ND                                   | 11             | 2.7     | 0.961                               |                                     |                          |             |
| IL-2      | 1        | 16  | 6.2  | 10     | 7.9            | 0.399   | 10                                   | 3.3                                  | 0.288          |         |                                     |                                     |                          |             |
|           | 2        | 20  | 6.4  | 21     | 6.2            | 0.947   | 15                                   | 4.6                                  | 0.349          |         |                                     |                                     |                          |             |
|           | 3        | 16  | 11.4 | 10     | 12.8           | 0.812   | ND                                   | 11                                   | 4.3            | 0.02    |                                     |                                     |                          |             |
| PHA       | IFN      | 1   | 11   | 253.7  | 5              | 15.8    | 0.007                                | 4                                    | 3132.0         | 0.01    |                                     |                                     |                          |             |
|           |          | 2   | 12   | 3051.4 | 14             | 2757.0  | 0.894                                | $\rho=0.67$ (0.02,0.92)              | 6              | 12690.2 | 0.092                               | $\rho=0.43$ (0.23,0.82)             |                          |             |
|           |          | 3   | 10   | 2292.3 | 5              | 31.9    | <0.001                               | $\text{CC}=\text{0.40}$ (0.03,0.67)  | 5              | 19433.9 | 0.022                               | $\text{CC}=\text{0.35}$ (0.16,0.72) |                          |             |
|           | TNF      | 1   | 8    | 3874.7 | 5              | 26.4    | <0.001                               | $\rho=0.81$ (0.01,0.88)              | 4              | 3009.9  | 0.758                               | $\rho=0.57$ (0.85,-0.06)            |                          |             |
|           |          | 2   | 13   | 2566.4 | 14             | 483.4   | 0.003                                | $\text{CC}=\text{0.19}$ (0.02,0.29)  | 8              | 2919.9  | 0.826                               | $\rho=0.53$ (0.81,-0.06)            |                          |             |
|           |          | 3   | 12   | 628.1  | 5              | 16.8    | <0.001                               |                                      | 7              | 5159.9  | 0.004                               |                                     |                          |             |
|           | IL-10    | 1   | 16   | 582.1  | 10             | 81.8    | <0.001                               | $\rho=0.59$ (0.34,0.76)              | 10             | 136.6   | <0.001                              | $\rho=0.10$ (0.24,0.41)             |                          |             |
|           |          | 2   | 20   | 1200.6 | 21             | 249.9   | <0.001                               |                                      | 15             | 369.6   | <0.001                              | $\text{CC}=\text{0.06}$ (0.15,0.27) |                          |             |
|           |          | 3   | 16   | 682.1  | 10             | 144.4   | 0.004                                | $\text{CC}=\text{0.19}$ (0.05,0.28)  | 11             | 235.3   | 0.024                               |                                     |                          |             |
|           | IL-5     | 1   | 16   | 8.7    | 10             | 11.0    | 0.604                                | 10                                   | 35.9           | <0.001  |                                     |                                     |                          |             |
|           |          | 2   | 20   | 37.0   | 21             | 111.7   | <0.001                               | $\rho=0.14$ (0.18,0.43)              | 15             | 178.1   | <0.001                              | $\rho=0.31$ (0.02,0.58)             |                          |             |
|           |          | 3   | 16   | 35.1   | 10             | 45.7    | 0.553                                | $\text{CC}=\text{0.11}$ (0.15,0.36)  | 11             | 161.0   | <0.001                              | $\text{CC}=\text{0.24}$ (0.02,0.47) |                          |             |
|           | IL-4     | 1   | 16   | 13.9   | 10             | 13.0    | 0.85                                 | 10                                   | 28.6           | 0.005   |                                     |                                     |                          |             |
|           |          | 2   | 20   | 26.1   | 21             | 37.4    | 0.163                                | $\rho=0.55$ (0.73,-0.29)             | 15             | 33.1    | 0.29                                | $\rho=0.10$ (0.23,0.42)             |                          |             |
|           |          | 3   | 16   | 12.3   | 10             | 16.9    | 0.353                                | $\text{CC}=\text{0.52}$ (0.71,-0.27) | 11             | 22.8    | 0.015                               | $\text{CC}=\text{0.09}$ (0.21,0.38) |                          |             |
| IL-2      | 1        | 16  | 53.5 | 10     | 144.3          | 0.048   | 10                                   | 1168.6                               | <0.001         |         |                                     |                                     |                          |             |
|           | 2        | 20  | 79.8 | 21     | 454.4          | <0.001  | $\rho=0.69$ (0.83,-0.49)             | 15                                   | 949.2          | <0.001  | $\rho=0.20$ (0.14,0.50)             |                                     |                          |             |
|           | 3        | 16  | 59.2 | 10     | 241.2          | 0.005   | $\text{CC}=\text{0.59}$ (0.73,-0.31) | 11                                   | 738.1          | <0.001  | $\text{CC}=\text{0.11}$ (0.07,0.29) |                                     |                          |             |
| LPS10     | IFN      | 1   | 5    | 14.8   | 5              | 672.0   | 0.003                                | 0                                    |                |         |                                     |                                     |                          |             |
|           |          | 2   | 10   | 727.9  | 5              | 1685.2  | 0.701                                | $\rho=0.51$ (0.03,0.82)              | 6              | 3821.1  | 0.08                                | $\rho=0.970$ (0.86,0.99)            |                          |             |
|           |          | 3   | 9    | 257.2  | 7              | 3824.7  | 0.005                                | $\text{CC}=\text{0.02}$ (0.005,0.04) | 6              | 1987.1  | 0.026                               | $\text{CC}=\text{0.76}$ (0.65,0.84) |                          |             |
|           | TNF      | 1   | 5    | 166.3  | 3              | 9390.9  | <0.001                               |                                      | 4              | 3405.5  | 0.001                               |                                     |                          |             |
|           |          | 2   | 10   | 4026.3 | 5              | 4422.7  | 0.903                                | INS                                  | 7              | 1830.0  | 0.24                                | $\rho=0.11$ (0.60,0.72)             |                          |             |
|           |          | 3   | 9    | 931.2  | 5              | 2831.5  | 0.157                                |                                      | 7              | 2711.2  | 0.124                               | $\text{CC}=\text{0.05}$ (0.27,0.35) |                          |             |
|           | IL-10    | 1   | 16   | 259.3  | 10             | 522.6   | 0.143                                |                                      | 10             | 72.5    | 0.002                               |                                     |                          |             |
|           |          | 2   | 20   | 986.1  | 16             | 541.8   | 0.124                                | $\rho=0.24$ (0.10,0.33)              | 10             | 83.4    | <0.001                              | $\rho=0.24$ (0.12,0.35)             |                          |             |
|           |          | 3   | 16   | 645.4  | 10             | 702.2   | 0.852                                | $\text{CC}=\text{0.29}$ (0.10,0.52)  | 12             | 100.8   | <0.001                              | $\text{CC}=\text{0.07}$ (0.04,0.18) |                          |             |
|           | IL-5     | 1   | 16   | 1.8    | 10             | 3.2     | 0.199                                | 10                                   | 1.8            | 0.847   |                                     |                                     |                          |             |
|           |          | 2   | 20   | 2.0    | 16             | 3.3     | 0.176                                | ND                                   | 10             | 2.2     | 0.808                               |                                     |                          |             |
|           |          | 3   | 16   | 2.4    | 10             | 6.4     | 0.026                                |                                      | 12             | 2.3     | 0.872                               |                                     |                          |             |
|           | IL-4     | 1   | 16   | 2.7    | 10             | 3.3     | 0.545                                | 10                                   | 2.3            | 0.554   |                                     |                                     |                          |             |
|           |          | 2   | 20   | 2.4    | 16             | 1.6     | 0.181                                | ND                                   | 10             | 2.1     | 0.654                               |                                     |                          |             |
|           |          | 3   | 16   | 3.0    | 10             | 4.6     | 0.406                                |                                      | 12             | 2.3     | 0.299                               |                                     |                          |             |
| IL-2      | 1        | 16  | 4.9  | 10     | 8.5            | 0.27    | 10                                   | 3.4                                  | 0.385          |         |                                     |                                     |                          |             |
|           | 2        | 20  | 3.7  | 16     | 7.4            | 0.091   | ND                                   | 10                                   | 4.6            | 0.378   |                                     |                                     |                          |             |
|           | 3        | 16  | 6.3  | 10     | 26.5           | 0.004   |                                      | 12                                   | 3.7            | 0.203   |                                     |                                     |                          |             |
| LPS100    | IFN      | 1   | 5    | 70.2   | 5              | 592.5   | 0.078                                | 0                                    |                |         |                                     |                                     |                          |             |
|           |          | 2   | 12   | 1283.7 | 10             | 4517.0  | 0.126                                | $\rho=0.63$ (0.20,0.86)              | 6              | 4803.8  | 0.119                               | $\rho=0.99$ (0.94,1.00)             |                          |             |
|           |          | 3   | 9    | 376.3  | 6              | 2821.1  | 0.046                                | $\text{CC}=\text{0.24}$ (0.04,0.43)  | 6              | 2105.5  | 0.058                               | $\text{CC}=\text{0.82}$ (0.75,0.86) |                          |             |
|           | TNF      | 1   | 5    | 2096.1 | 1              | 11504.7 | 0.249                                |                                      | 2              | 5471.9  | 0.386                               |                                     |                          |             |
|           |          | 2   | 10   | 4644.1 | 9              | 33250.9 | 0.822                                | INS                                  | 6              | 3222.2  | 0.575                               | $\rho=0.32$ (0.79,0.39)             |                          |             |
|           |          | 3   | 10   | 1882.1 | 5              | 5430.8  | 0.167                                |                                      | 6              | 3686.6  | 0.334                               | $\text{CC}=\text{0.19}$ (0.53,0.20) |                          |             |
|           | IL-10    | 1   | 16   | 610.2  | 10             | 718.0   | 0.734                                |                                      | 10             | 123.2   | <0.001                              |                                     |                          |             |
|           |          | 2   | 19   | 1121.9 | 15             | 388.4   | 0.008                                | $\rho=0.29$ (0.06,0.58)              | 15             | 203.6   | <0.001                              | $\rho=0.11$ (0.23,0.42)             |                          |             |
|           |          | 3   | 16   | 802.6  | 10             | 1032.1  | 0.599                                | $\text{CC}=\text{0.14}$ (0.10,0.37)  | 12             | 173.2   | <0.001                              | $\text{CC}=\text{0.04}$ (0.03,0.15) |                          |             |
|           | IL-5     | 1   | 16   | 2.5    | 10             | 3.9     | 0.286                                | 10                                   | 1.8            | 0.421   |                                     |                                     |                          |             |
|           |          | 2   | 19   | 2.0    | 15             | 3.8     | 0.096                                | ND                                   | 15             | 2.1     | 0.764                               |                                     |                          |             |
|           |          | 3   | 16   | 2.2    | 10             | 8.3     | 0.047                                |                                      | 12             | 2.1     | 0.875                               |                                     |                          |             |
|           | IL-4     | 1   | 16   | 3.4    | 10             | 2.8     | 0.618                                | 10                                   | 2.3            | 0.149   |                                     |                                     |                          |             |
|           |          | 2   | 19   | 2.5    | 15             | 2.9     | 0.588                                | ND                                   | 15             | 2.5     | 0.97                                |                                     |                          |             |
|           |          | 3   | 16   | 3.1    | 10             | 2.9     | 0.842                                |                                      | 12             | 2.0     | 0.082                               |                                     |                          |             |
| IL-2      | 1        | 16  | 7.7  | 10     | 8.6            | 0.826   | 10                                   | 3.3                                  | 0.049          |         |                                     |                                     |                          |             |
|           | 2        | 19  | 3.9  | 15     | 9.7            | 0.036   | ND                                   | 15                                   | 4.1            | 0.809   |                                     |                                     |                          |             |
|           | 3        | 16  | 6.2  | 10     | 20.8           | 0.016   |                                      | 12                                   | 4.2            | 0.334   |                                     |                                     |                          |             |
| BLA2      | IFN      | 3   | 15   | 79.7   | 10             | 1218.7  | <0.001                               |                                      | 11             | 67.8    | 0.815                               |                                     |                          |             |
|           |          | 5   | 21   | 229.8  | 16             | 211.1   | 0.893                                | $\rho=0.04$ (0.37,0.30)              | 19             | 179.7   | 0.667                               | $\rho=0.07$ (0.36,0.24)             |                          |             |
|           |          | 7   | 14   | 206.3  | 10             | 162.2   | 0.378                                | $\text{CC}=\text{0.04}$ (0.36,0.29)  | 19             | 112.5   | 0.343                               | $\text{CC}=\text{0.06}$ (0.33,0.22) |                          |             |
|           | TNF      | 3   | 14   | 389.3  | 4              | 2142.3  | 0.027                                |                                      | 10             | 1685.3  | 0.01                                |                                     |                          |             |
|           |          | 5   | 18   | 218.4  | 13             | 339.7   | 0.39                                 | $\rho=0.54$ (0.15,0.79)              | 16             | 1161.9  | <0.001                              | $\rho=0.17$ (0.17,0.48)             |                          |             |
|           |          | 7   | 13   | 174.4  | 8              | 290.5   | 0.419                                | $\text{CC}=\text{0.54}$ (0.16,0.76)  | 18             | 547.9   | 0.027                               |                                     |                          |             |
|           | IL-10    | 3   | 16   | 968.1  | 10             | 643.2   | 0.795                                |                                      | 12             | 120.0   | <0.001                              |                                     |                          |             |
|           |          | 5   | 21   | 219.6  | 17             | 68.2    | <0.001                               | $\rho=0.31$ (0.02,0.57)              | 20             | 82.7    | 0.002                               | $\rho=0.07$ (0.35,0.22)             |                          |             |
|           |          | 7   | 15   | 130.5  | 11             | 24.8    | <0.001                               | $\text{CC}=\text{0.15}$ (0.01,0.30)  | 20             | 41.3    | <0.001                              | $\text{CC}=\text{0.13}$ (0.13,0.38) |                          |             |
|           | IL-5     | 3   | 16   | 3.1    | 10             | 7.3     | 0.05                                 |                                      | 12             | 3.4     | 0.731                               |                                     |                          |             |
|           |          | 5   | 21   | 6.1    | 17             | 5.9     | 0.933                                | ND                                   | 20             | 6.0     | 0.954                               |                                     |                          |             |
|           |          | 7   | 15   | 7.3    | 11             | 7.4     | 0.982                                |                                      | 20             | 16.4    | 0.246                               |                                     |                          |             |
|           | IL-4     | 3   | 16   | 3.0    | 10             | 5.1     | 0.139                                |                                      | 12             | 2.9     | 0.841                               |                                     |                          |             |
|           |          | 5   | 21   | 2.9    | 17             | 1.7     | 0.053                                | ND                                   | 20             | 2.6     | 0.593                               |                                     |                          |             |
|           |          | 7   | 15   | 2.7    | 11             | 1.6     | 0.104                                |                                      | 20             | 3.4     | 0.364                               |                                     |                          |             |
| IL-2      | 3        | 16  | 8.4  | 10     | 26.4           | 0.022   |                                      | 12                                   | 4.5            | 0.13    |                                     |                                     |                          |             |
|           | 5        | 21  | 13.4 | 17     | 7.9            | 0.191   | $\rho=0.17$ (0.46,0.16)              | 20                                   | 7.1            | 0.066   |                                     |                                     |                          |             |
|           | 7        | 15  | 12.5 | 11     | 6.2            | 0.074   | $\text{CC}=\text{0.16}$ (0.44,0.15)  | 20                                   | 11.2           | 0.779   |                                     |                                     |                          |             |
| DERF1     | IFN      | 3   | 16   | 9.8    | 10             | 28.9    | 0.16                                 |                                      | 12             | 4.5     | 0.242                               |                                     |                          |             |
|           |          | 5   | 21   | 16.8   | 16             | 18.3    | 0.899                                |                                      | 20             | 23.3    | 0.8                                 |                                     |                          |             |
|           |          | 7   | 13   | 38.6   | 10             | 21.9    | 0.48                                 | $\text{CC}=\text{0.40}$ (0.09,0.63)  | 20             | 12.7    | 0.086                               | $\rho=0.430$ (0.16,0.65             |                          |             |
