# Supplementary material for: Standardization and performance evaluation of mononuclear cell cytokine secretion assays in a multicenter study
Source: PubMed Central journal article supplement (PMC1762025; doi:10.1186/1471-2172-7-29), 2006-12-12
Supplement: 1471-2172-7-29-S2.pdf [file 1471-2172-7-29-S2.pdf]

**Supplemental Table 2. - Cytokine from fresh and cryopreserved CBMC.**

| Stimulant        | cytokine         | N<br>(below limit) | Geometric<br>mean-fresh<br>(SD) | N<br>(below limit) | Geometric<br>mean-cryo<br>(SD) | the ratio of<br>Fresh/ CRF<br>(95% confidence) | p-value | Rho                    | CCC                 |
|------------------|------------------|--------------------|---------------------------------|--------------------|--------------------------------|------------------------------------------------|---------|------------------------|---------------------|
| <b>INNATE:</b>   |                  |                    |                                 |                    |                                |                                                |         |                        |                     |
| <b>MEDIUM</b>    | <b>IFN-gamma</b> | 40(0)              | 7.96(1.31)                      | 34(29)             | 7.6(1.39)                      | 0.95(0.83,1.1)                                 | 0.498   | -0.08(-0.41,0.26)      | -0.06(-0.33,0.20)   |
|                  | <b>IFN-alpha</b> | 40(0)              | 8.86(1.28)                      | 34(27)             | 7.48(1.32)                     | 0.84 (0.75,0.95)                               | 0.007   | -0.06(-0.39,0.28)      | -0.05(-0.33,0.23)   |
|                  | <b>TNF</b>       | 40(38)             | 7.41(1.46)                      | 34(29)             | 8.28(1.89)                     | 1.12(0.88,1.42)                                | 0.361   | -0.08(-0.41,0.27)      | -0.07(-0.36,0.24)   |
|                  | <b>IL-10</b>     | 40(40)             | 6.8 (1)                         | 34(32)             | 7.53 (1.52)                    | 1.11 (0.97,1.26)                               | 0.123   |                        |                     |
|                  | <b>IL-12 p40</b> | 40(0)              | 12.82 (1.38)                    | 34(0)              | 27.14 (2.01)                   | 2.12 (1.66,2.71)                               | <0.001  | 0.07(-0.27,0.40)       | 0.02(-0.09,0.14)    |
|                  | <b>IL-12 p70</b> | 40(40)             | 6.8(1)                          | 34(34)             | 6.8(1)                         |                                                |         |                        |                     |
|                  | <b>Rantes</b>    | 40(0)              | 620.4 (2.11)                    | 34(0)              | 1073.7 (1.71)                  | 1.73 (1.27,2.35)                               | 0.001   | -0.11(-0.44,0.23)      | -0.09(-0.35,0.18)   |
| <b>LPS</b>       | <b>IFN-gamma</b> | 40(0)              | 8 (1.3)                         | 38(32)             | 7.65 (1.39)                    | 0.96 (0.84,1.09)                               | 0.518   | -0.01(-0.33,0.31)      | -0.01(-0.32,0.29)   |
|                  | <b>IFN-alpha</b> | 40(0)              | 21.08 (2.78)                    | 38(27)             | 7.65 (1.29)                    | 0.36 (0.26,0.51)                               | <0.001  | -0.24(-0.52,0.08)      | -0.06(-0.13,0.02)   |
|                  | <b>TNF</b>       | 40(0)              | 1279(2.02)                      | 38(2)              | 105.5(3.43)                    | 0.08(0.05,0.13)                                | <0.001  | 0.13(-0.20,0.43)       | 0.04(-0.06,0.14)    |
|                  | <b>IL-10</b>     | 40(0)              | 137.27 (1.49)                   | 38(7)              | 39.91 (3.24)                   | 0.29 (0.2,0.43)                                | <0.001  | 0.47(0.17,0.68) **     | 0.10(0.03,0.17) **  |
|                  | <b>IL-12 p40</b> | 40(0)              | 103.36 (2.25)                   | 38(0)              | 26.84 (2.11)                   | 0.26 (0.18,0.37)                               | <0.001  | -0.18(-0.47,0.15)      | -0.07(-0.20,0.06)   |
|                  | <b>IL-12 p70</b> | 40(38)             | 6.87(1.05)                      | 38(38)             | 6.8(1)                         |                                                |         |                        |                     |
|                  | <b>Rantes</b>    | 40(0)              | 677.92 (1.5)                    | 38(0)              | 991.72 (1.3)                   | 1.46 (1.25,1.71)                               | <0.001  | -0.52(-0.72,-0.24) *** | -0.28(-0.46,-0.08)  |
| <b>ADAPTIVE:</b> |                  |                    |                                 |                    |                                |                                                |         |                        |                     |
| <b>MEDIUM</b>    | <b>IFN-gamma</b> | 40(0)              | 7.52(1.12)                      | 32(0)              | 13.14(1.19)                    | 1.75(1.63,1.87)                                | <0.001  | -0.13(-0.46,0.23)      | -0.02(-0.06,0.03)   |
|                  | <b>IL-10</b>     | 40(40)             | 6.8(1)                          | 32(31)             | 6.93(1.11)                     | 1.02(0.99,1.05)                                | 0.267   |                        |                     |
|                  | <b>IL-13</b>     | 40(40)             | 6.8(1)                          | 32(30)             | 7.47(1.45)                     | 1.1(0.98,1.23)                                 | 0.112   |                        |                     |
|                  | <b>IL-4</b>      | 40(0)              | 8.12(1.02)                      | 32(32)             | 6.8(1)                         | 0.84(0.83,0.84)                                | <0.001  |                        |                     |
|                  | <b>IL-5</b>      | 40(40)             | 6.8(1)                          | 32(32)             | 6.8(1)                         |                                                |         |                        |                     |
|                  | <b>VEGF</b>      | 40(0)              | 48.96(2.57)                     | 32(0)              | 19.04(1.61)                    | 0.39(0.27,0.56)                                | <0.001  | 0.15(-0.21,0.47)       | 0.06(-0.08,0.19)    |
| <b>PHA</b>       | <b>IFN-gamma</b> | 40(0)              | 707.79 (3.12)                   | 38(0)              | 21.67(2.51)                    | 0.03 (0.02,0.05)                               | <0.001  | -0.49(-0.70,-0.21) **  | -0.07(-0.12,-0.02)  |
|                  | <b>IL-10</b>     | 40(0)              | 185.34 (3.26)                   | 38(21)             | 8.96 (1.56)                    | 0.05 (0.03,0.07)                               | <0.001  | 0.17(-0.15,0.47)       | 0.02(-0.02,0.05)    |
|                  | <b>IL-13</b>     | 40(0)              | 240.65 (2.46)                   | 38(11)             | 33.71 (3.95)                   | 0.14 (0.08,0.24)                               | <0.001  | 0.58(0.32,0.76) ***    | 0.22(0.09,0.34) *** |
|                  | <b>IL-4</b>      | 40(40)             | 24.16 (2.45)                    | 38(27)             | 7.92 (1.3)                     | 0.33 (0.24,0.44)                               | <0.001  | 0.75(0.57,0.87) ***    | 0.17(0.09,0.25) *** |
|                  | <b>IL-5</b>      | 40(40)             | 6.8(1)                          | 40(40)             | 6.8(1)                         |                                                |         |                        |                     |
|                  | <b>VEGF</b>      | 40(0)              | 15.62 (1.35)                    | 38(0)              | 15.6 (1.36)                    | 1 (0.87,1.15)                                  | 0.984   | -0.15(-0.45,0.18)      | -0.15(-0.45,0.17)   |
